# Supplementary material for: Unconventional Therapy with IgY in a Psoriatic Mouse Model Targeting Gut Microbiome
Source: MDPI journal article supplement (doi:10.3390/jpm11090841), 2021-08-26
Supplement: s1 [file s1]

Table S1. Individual experimental data for erythema (E), skin scaling (S), thickening (T) and PASI score.

|                             | Time      | Day 1 |     |     |      | Day 2 |     |     |      | Day 3 |     |     |      | Day 4 |     |     |      | Day 5 |     |     |      | Day 6 |     |     |      |     |     | Day 7 |      |  |  |
|-----------------------------|-----------|-------|-----|-----|------|-------|-----|-----|------|-------|-----|-----|------|-------|-----|-----|------|-------|-----|-----|------|-------|-----|-----|------|-----|-----|-------|------|--|--|
| Group                       | Mouse nb. | E     | S   | T   | PASI | E   | S   | T     | PASI |  |  |
| Naturally remitted Ps group | F1        | 0     | 0   | 0   | 0    | 1     | 0   | 0   | 1    | 2     | 1   | 1   | 4    | 2.5   | 1.5 | 2   | 6    | 3     | 2.5 | 3   | 8.5  | 3.5   | 3.5 | 3.5 | 8.5  | 3   | 4   | 4     | 11   |  |  |
|                             | F2        | 0     | 0   | 0   | 0    | 1.5   | 0   | 0.5 | 2    | 2     | 1   | 1   | 4    | 3     | 1.5 | 2   | 6.5  | 3.5   | 2.5 | 3   | 9    | 3.5   | 3   | 3.5 | 9    | 3   | 3.5 | 4     | 10.5 |  |  |
|                             | F3        | 0     | 0   | 0   | 0    | 1.5   | 0   | 1.5 | 3    | 2     | 1   | 1.5 | 4.5  | 2.5   | 1.5 | 2   | 6    | 4     | 2.5 | 2.5 | 9    | 4     | 3   | 3   | 9    | 3.5 | 3   | 3.5   | 10   |  |  |
|                             | F4        | 0     | 0   | 0   | 0    | 1.5   | 0   | 0.5 | 2    | 2     | 1.5 | 1   | 4.5  | 3     | 1.5 | 2   | 6.5  | 3.5   | 2   | 3   | 8.5  | 3.5   | 3   | 3.5 | 8.5  | 3   | 3.5 | 4     | 10.5 |  |  |
|                             | M1        | 0     | 0   | 0   | 0    | 1     | 0   | 0   | 1    | 2     | 1.5 | 0.5 | 4    | 3     | 1   | 1.5 | 5.5  | 3.5   | 2   | 2   | 7.5  | 4     | 3   | 3   | 7.5  | 3   | 3.5 | 3.5   | 10   |  |  |
|                             | M2        | 0     | 0   | 0   | 0    | 1     | 0   | 0   | 1    | 1.5   | 1   | 1   | 3.5  | 2     | 1   | 2   | 5    | 3     | 3   | 3   | 9    | 3.5   | 3.5 | 3.5 | 9    | 2   | 3.5 | 4     | 9.5  |  |  |
|                             | M3        | 0     | 0   | 0   | 0    | 1     | 0   | 0   | 1    | 2     | 1.5 | 1   | 4.5  | 2.5   | 1.5 | 2   | 6    | 3     | 2.5 | 3   | 8.5  | 3.5   | 3   | 4   | 8.5  | 2   | 3.5 | 4     | 9.5  |  |  |
|                             | M4        | 0     | 0   | 0   | 0    | 1     | 0   | 0   | 1    | 2     | 1   | 1   | 4    | 3     | 1.5 | 2   | 6.5  | 3.5   | 3   | 3   | 9.5  | 4     | 3.5 | 3.5 | 9.5  | 2   | 4   | 4     | 10   |  |  |
| Ps group                    | F1        | 0     | 0   | 0   | 0    | 1     | 0   | 0   | 1    | 2.5   | 1   | 1   | 4.5  | 2.5   | 1.5 | 1.5 | 5.5  | 3     | 2.5 | 3   | 8.5  | 3     | 3.5 | 3.5 | 8.5  | 2.5 | 4   | 3.5   | 10   |  |  |
|                             | F2        | 0     | 0   | 0   | 0    | 1     | 0   | 0   | 1    | 2     | 1   | 0.5 | 3.5  | 2     | 2   | 1.5 | 5.5  | 3     | 2.5 | 2   | 7.5  | 3     | 3   | 3   | 7.5  | 2.5 | 3   | 3.5   | 9    |  |  |
|                             | F3        | 0     | 0   | 0   | 0    | 1     | 0   | 0.5 | 1.5  | 1.5   | 1   | 1   | 3.5  | 2     | 2   | 2   | 6    | 3     | 3   | 3   | 9    | 3     | 4   | 3.5 | 9    | 2.5 | 3.5 | 4     | 10   |  |  |
|                             | F4        | 0     | 0   | 0   | 0    | 1     | 0   | 0   | 1    | 2     | 1   | 0.5 | 3.5  | 2     | 1   | 1   | 4    | 3     | 3   | 2.5 | 8.5  | 2.5   | 3   | 3   | 8.5  | 2   | 3   | 3.5   | 8.5  |  |  |
|                             | M1        | 0     | 0   | 0   | 0    | 1     | 0   | 0   | 1    | 2     | 1.5 | 1   | 4.5  | 3     | 2   | 2.5 | 7.5  | 3.5   | 3   | 3   | 9.5  | 3     | 4   | 3   | 9.5  | 3   | 3.5 | 4     | 10.5 |  |  |
|                             | M2        | 0     | 0   | 0   | 0    | 1     | 0   | 0   | 1    | 2     | 1.5 | 1   | 4.5  | 3     | 2   | 2.5 | 7.5  | 3     | 3   | 3   | 9    | 3     | 4   | 3   | 9    | 3   | 3.5 | 4     | 10.5 |  |  |
|                             | M3        | 0     | 0   | 0   | 0    | 1     | 0   | 0   | 1    | 2     | 1.5 | 2   | 5.5  | 3     | 2   | 3   | 8    | 3.5   | 3   | 3.5 | 10   | 3     | 4   | 4   | 10   | 3   | 3.5 | 4     | 10.5 |  |  |
|                             | M3        | 0     | 0   | 0   | 0    | 1.5   | 0   | 0   | 1.5  | 2.5   | 1.5 | 1.5 | 5.5  | 3     | 2   | 2   | 7    | 3     | 2.5 | 3   | 8.5  | 3.5   | 3   | 3   | 8.5  | 2   | 3.5 | 3.5   | 9    |  |  |
| IgY treated Ps group        | F1        | 0     | 0   | 0   | 0    | 1     | 0   | 1.5 | 2.5  | 2.5   | 1   | 1.5 | 5    | 2.5   | 1   | 2   | 5.5  | 4     | 2   | 3   | 9    | 4     | 2.5 | 3.5 | 9    | 3   | 3   | 4     | 10   |  |  |
|                             | F2        | 0     | 0   | 0   | 0    | 1     | 0   | 1   | 2    | 3     | 1   | 1.5 | 5.5  | 3     | 1.5 | 2   | 6.5  | 4     | 2   | 3   | 9    | 4     | 3   | 3.5 | 9    | 3   | 3.5 | 4     | 10.5 |  |  |
|                             | F3        | 0     | 0   | 0   | 0    | 1     | 0   | 1   | 2    | 2.5   | 0   | 1.5 | 4    | 3     | 1   | 2   | 6    | 4     | 2.5 | 3   | 9.5  | 4     | 3   | 3   | 9.5  | 3   | 3.5 | 3.5   | 10   |  |  |
|                             | M1        | 0     | 0   | 0   | 0    | 1     | 0   | 1.5 | 2.5  | 1.5   | 1.5 | 2   | 5    | 2     | 2   | 2.5 | 6.5  | 3     | 2.5 | 3   | 8.5  | 3.5   | 3   | 3.5 | 8.5  | 3   | 3.5 | 4     | 10.5 |  |  |
|                             | M2        | 0     | 0   | 0   | 0    | 1     | 0   | 1   | 2    | 1.5   | 1   | 2   | 4.5  | 2     | 2   | 2.5 | 6.5  | 3     | 3   | 3.5 | 9.5  | 3.5   | 4   | 3.5 | 9.5  | 3   | 4   | 4     | 11   |  |  |
|                             | M3        | 0     | 0   | 0   | 0    | 1     | 0   | 1.5 | 2.5  | 2     | 1.5 | 2   | 5.5  | 2.5   | 2   | 2.5 | 7    | 3     | 3   | 3.5 | 9.5  | 3.5   | 3.5 | 3.5 | 9.5  | 3   | 4   | 4     | 11   |  |  |
|                             | F4        | 0     | 0   | 0   | 0    | 1.5   | 0   | 0   | 1.5  | 2.5   | 1   | 1   | 4.5  | 3     | 1.5 | 2   | 6.5  | 3.5   | 2   | 2.5 | 8    | 3.5   | 2.5 | 2.5 | 8    | 3   | 3   | 3     | 9    |  |  |
|                             | F5        | 0     | 0   | 0   | 0    | 1.5   | 0   | 0   | 1.5  | 2     | 1   | 1   | 4    | 3     | 2   | 2   | 7    | 3.5   | 2.5 | 2.5 | 8.5  | 3.5   | 2.5 | 2.5 | 8.5  | 3   | 3   | 3     | 9    |  |  |
|                             | F6        | 0     | 0   | 0   | 0    | 1.5   | 0   | 0   | 1.5  | 2     | 1   | 1   | 4    | 2.5   | 1.5 | 1.5 | 5.5  | 3.5   | 2.5 | 2.5 | 8.5  | 3.5   | 2.5 | 2.5 | 8.5  | 3   | 3   | 3     | 9    |  |  |
|                             | M4        | 0     | 0   | 0   | 0    | 1     | 0   | 0   | 1    | 2     | 1   | 1   | 4    | 3     | 1.5 | 1.5 | 6    | 3     | 3   | 2.5 | 8.5  | 3     | 3   | 3.5 | 8.5  | 2.5 | 3.5 | 3.5   | 9.5  |  |  |
|                             | M5        | 0     | 0   | 0   | 0    | 1.5   | 0   | 0   | 1.5  | 2.5   | 1   | 1   | 4.5  | 3     | 1.5 | 1.5 | 6    | 3.5   | 2   | 2.5 | 8    | 3.5   | 2.5 | 3   | 8    | 3   | 3.5 | 3.5   | 10   |  |  |
|                             | M6        | 0     | 0   | 0   | 0    | 1     | 0   | 0   | 1    | 2     | 1   | 1   | 4    | 2.5   | 1.5 | 1.5 | 5.5  | 3     | 2.5 | 2.5 | 8    | 3     | 2.5 | 3.5 | 8    | 2.5 | 3.5 | 3     | 9    |  |  |
|                             | Average   | 0.0   | 0.0 | 0.0 | 0.0  | 1.1   | 0.0 | 0.4 | 1.5  | 2.1   | 1.1 | 1.2 | 4.4  | 2.6   | 1.6 | 2.0 | 6.2  | 3.3   | 2.6 | 2.8 | 8.7  | 3.4   | 3.2 | 3.3 | 8.7  | 2.8 | 3.5 | 3.7   | 9.9  |  |  |
|                             | Stdev     | 0.0   | 0.0 | 0.0 | 0.0  | 0.2   | 0.0 | 0.6 | 0.6  | 0.4   | 0.3 | 0.4 | 0.6  | 0.4   | 0.4 | 0.4 | 0.8  | 0.4   | 0.4 | 0.4 | 0.6  | 0.4   | 0.5 | 0.4 | 0.6  | 0.4 | 0.3 | 0.4   | 0.7  |  |  |

Table S2. Individual histological parameters for each mouse from groups control, naturally remitted, psoriasis and IgY treated (- represents the absence of the investigated parameter, + low presence; ++ medium presence; +++ intense presence; ++++ extremely high presence)

| Parameter                         | Control group |          | Naturally remitted |          | Psoriasis |          | IgY treated |          |
|-----------------------------------|---------------|----------|--------------------|----------|-----------|----------|-------------|----------|
|                                   | Mouse nb.     | Presence | Mouse nb           | Presence | Mouse nb  | Presence | Mouse nb    | Presence |
| Vessels dilated and tortuous      | 1             | -        | 1                  | -        | 1         | ++       | 1           | +        |
|                                   | 2             | -        | 2                  | -        | 2         | +++      | 2           | -        |
|                                   | 3             | -        | 3                  | +        | 3         | +++      | 3           | -        |
|                                   | 4             | -        | 4                  | -        | 4         | ++++     | 4           | +        |
|                                   | 5             | -        | 5                  | -        | 5         | ++       | 5           | -        |
|                                   | 6             | -        | 6                  | -        | 6         | +++      | 6           | -        |
|                                   | 7             | -        | 7                  | -        | 7         | +++      | 7           | -        |
|                                   | 8             | -        | 8                  | -        | 8         | +++      | 8           | -        |
|                                   |               |          |                    |          |           |          | 9           | -        |
|                                   |               |          |                    |          |           |          | 10          | +        |
|                                   |               |          |                    |          |           |          | 11          | -        |
|                                   |               |          |                    |          |           |          | 12          | -        |
| Oedema and lymphocytic infiltrate | 1             | -        | 1                  | -        | 1         | +++      | 1           | -        |
|                                   | 2             | -        | 2                  | -        | 2         | +++      | 2           | +        |
|                                   | 3             | -        | 3                  | +        | 3         | +++      | 3           | -        |
|                                   | 4             | -        | 4                  | -        | 4         | ++++     | 4           | -        |
|                                   | 5             | -        | 5                  | -        | 5         | +++      | 5           | -        |
|                                   | 6             | -        | 6                  | -        | 6         | +++      | 6           | -        |
|                                   | 7             | -        | 7                  | -        | 7         | +++      | 7           | -        |
|                                   | 8             | -        | 8                  | -        | 8         | +++      | 8           | -        |
|                                   |               |          |                    |          |           |          | 9           | -        |
|                                   |               |          |                    |          |           |          | 10          | +        |
|                                   |               |          |                    |          |           |          | 11          | -        |
|                                   |               |          |                    |          |           |          | 12          | -        |
| Acanthosis                        | 1             | -        | 1                  | -        | 1         | ++++     | 1           | -        |
|                                   | 2             | -        | 2                  | -        | 2         | ++++     | 2           | -        |
|                                   | 3             | -        | 3                  | -        | 3         | ++++     | 3           | -        |
|                                   | 4             | -        | 4                  | -        | 4         | ++++     | 4           | -        |
|                                   | 5             | -        | 5                  | -        | 5         | ++++     | 5           | -        |
|                                   | 6             | -        | 6                  | -        | 6         | ++++     | 6           | -        |

|                               |   |   |   |   |   |      |    |   |
|-------------------------------|---|---|---|---|---|------|----|---|
|                               | 7 | - | 7 | - | 7 | ++++ | 7  | - |
|                               | 8 | - | 8 | - | 8 | ++++ | 8  | - |
|                               |   |   |   |   |   |      | 9  | - |
|                               |   |   |   |   |   |      | 10 | - |
|                               |   |   |   |   |   |      | 11 | + |
|                               |   |   |   |   |   |      | 12 | - |
| Hyperkeratosis                | 1 | - | 1 | - | 1 | ++++ | 1  | - |
|                               | 2 | - | 2 | - | 2 | ++++ | 2  | - |
|                               | 3 | - | 3 | - | 3 | ++++ | 3  | - |
|                               | 4 | - | 4 | + | 4 | ++++ | 4  | - |
|                               | 5 | - | 5 | - | 5 | ++++ | 5  | - |
|                               | 6 | - | 6 | - | 6 | ++++ | 6  | - |
|                               | 7 | - | 7 | - | 7 | ++++ | 7  | - |
|                               | 8 | - | 8 | - | 8 | ++++ | 8  | - |
|                               |   |   |   |   |   |      | 9  | - |
|                               |   |   |   |   |   |      | 10 | + |
|                               |   |   |   |   |   |      | 11 | - |
|                               |   |   |   |   |   |      | 12 | - |
| Parakeratosis                 | 1 | - | 1 | - | 1 | +++  | 1  | - |
|                               | 2 | - | 2 | - | 2 | +++  | 2  | + |
|                               | 3 | - | 3 | - | 3 | +++  | 3  | - |
|                               | 4 | - | 4 | - | 4 | +++  | 4  | - |
|                               | 5 | - | 5 | - | 5 | ++   | 5  | - |
|                               | 6 | - | 6 | - | 6 | +++  | 6  | - |
|                               | 7 | - | 7 | - | 7 | +++  | 7  | - |
|                               | 8 | - | 8 | - | 8 | +++  | 8  | - |
|                               |   |   |   |   |   |      | 9  | - |
|                               |   |   |   |   |   |      | 10 | + |
|                               |   |   |   |   |   |      | 11 | + |
|                               |   |   |   |   |   |      | 12 | - |
| Elongation of the rete ridges | 1 | - | 1 | - | 1 | ++++ | 1  | - |
|                               | 2 | - | 2 | - | 2 | ++++ | 2  | - |
|                               | 3 | - | 3 | - | 3 | ++++ | 3  | - |
|                               | 4 | - | 4 | - | 4 | ++++ | 4  | - |
|                               | 5 | - | 5 | - | 5 | ++++ | 5  | - |
|                               | 6 | - | 6 | - | 6 | ++++ | 6  | - |
|                               | 7 | - | 7 | - | 7 | ++++ | 7  | - |

|  |   |   |   |   |   |      |    |   |
|--|---|---|---|---|---|------|----|---|
|  | 8 | - | 8 | - | 8 | ++++ | 8  | - |
|  |   |   |   |   |   |      | 9  | - |
|  |   |   |   |   |   |      | 10 | - |
|  |   |   |   |   |   |      | 11 | - |
|  |   |   |   |   |   |      | 12 | - |
